# Supplementary material for: Glycocalyx degradation and the endotheliopathy of viral infection
Source: PubMed Central journal article supplement (PMC9581367; doi:10.1371/journal.pone.0276232), 2022-10-19
Supplement: pone.0276232.s001.pdf [file pone.0276232.s001.pdf]

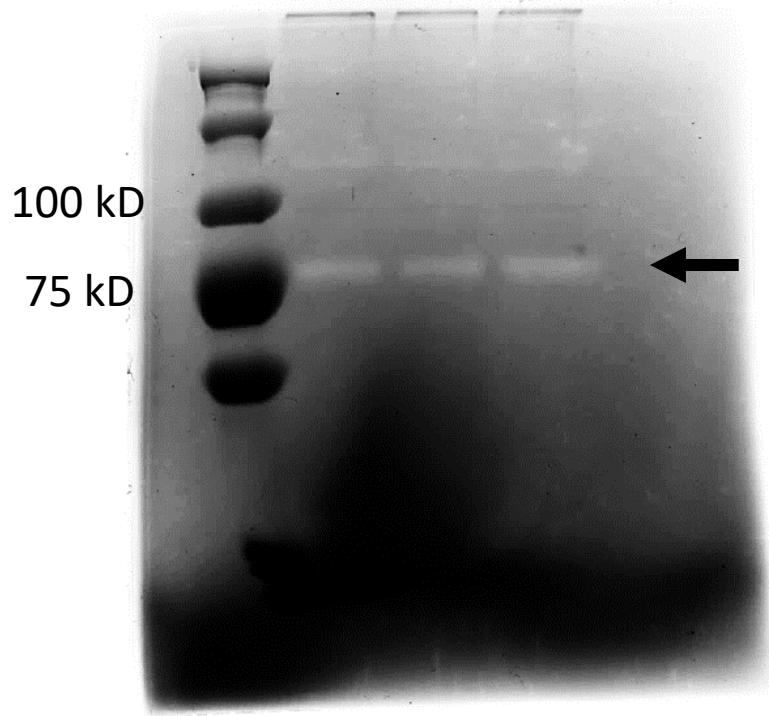

Gelatin zymography

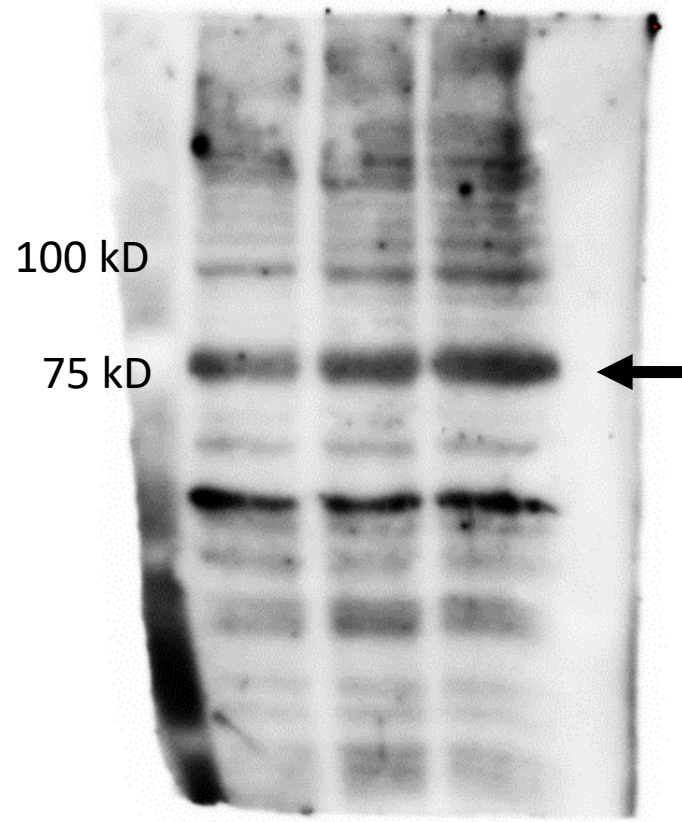

MMP9 western blot

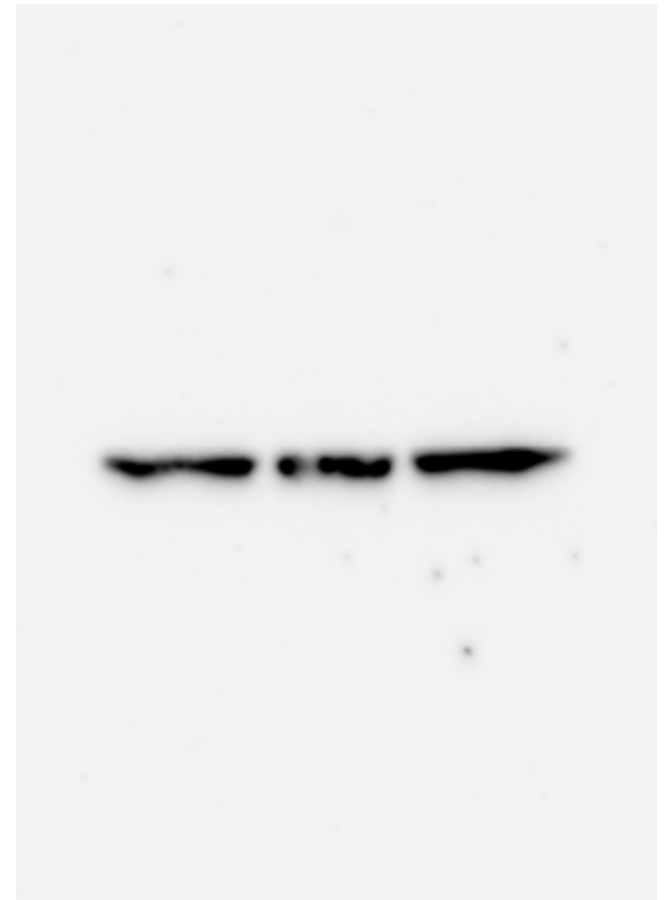

$\beta$  Tubulin western blot
